# Supplementary figures and images for: Cryo-EM structure of the Plasmodium falciparum 80S ribosome bound to the anti-protozoan drug emetine
Source: eLife journal article supplement (doi:10.7554/elife.03080), 2014-06-09

Figure 2 - figure supplement 1

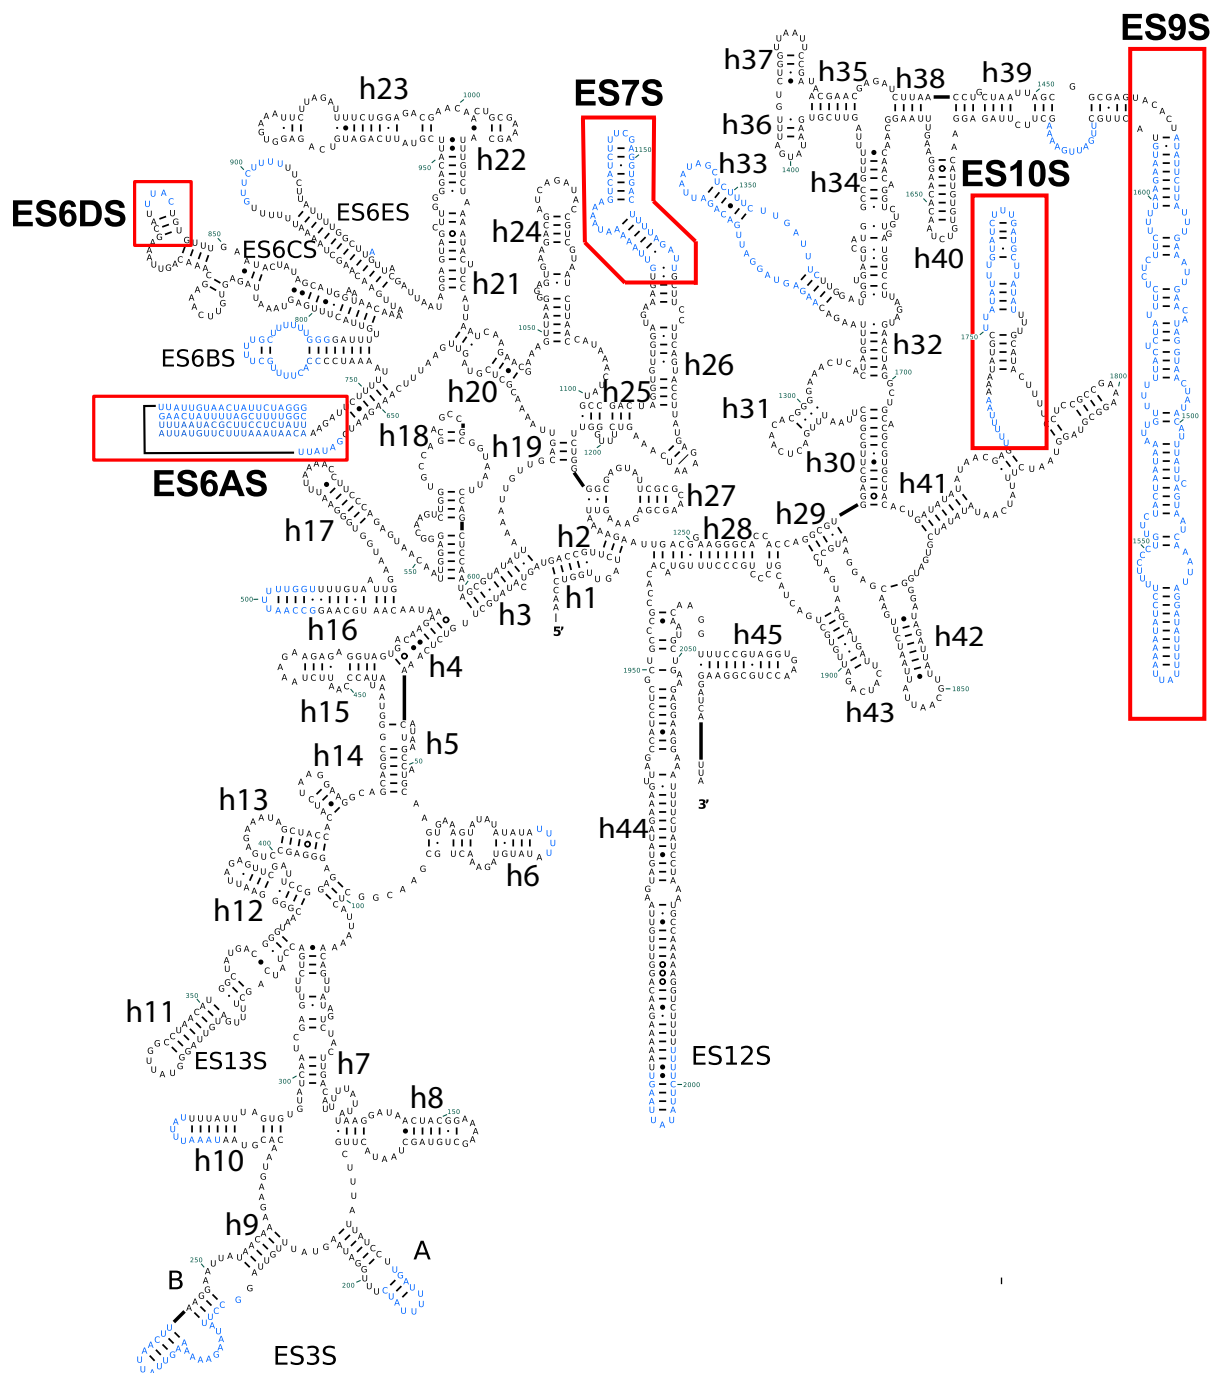

Supplement: supp [file elife-03080-supp-v1.zip]

Figure 2 - figure supplement 3

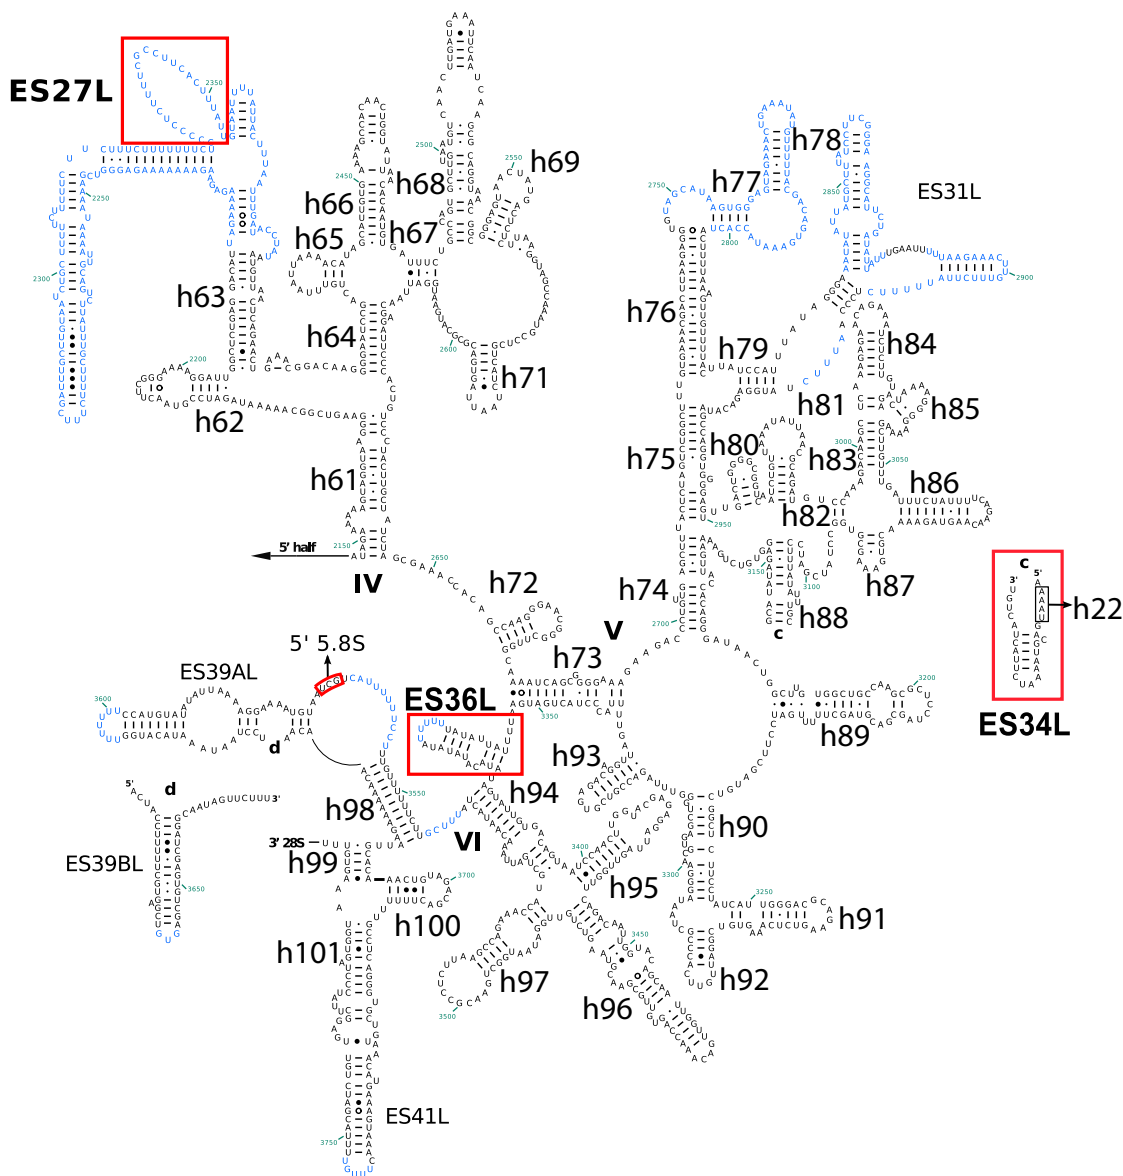

Supplement: supp [file elife-03080-supp-v1.zip]

Figure 2 - figure supplement 2

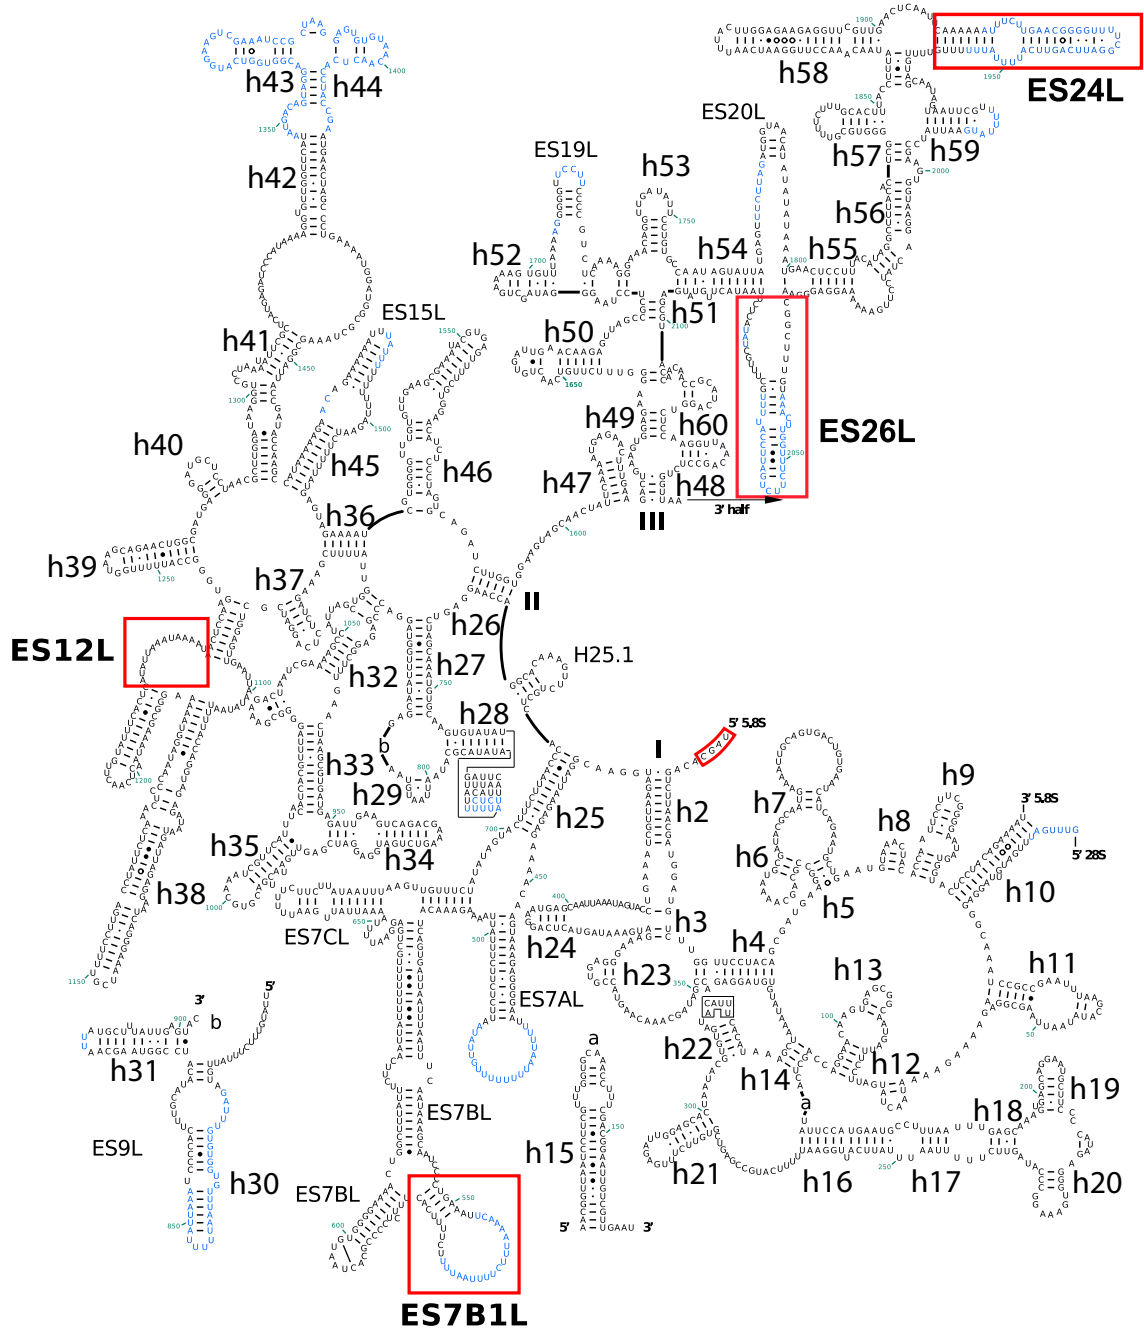

Supplement: supp [file elife-03080-supp-v1.zip]

Figure 1 - figure supplement 1

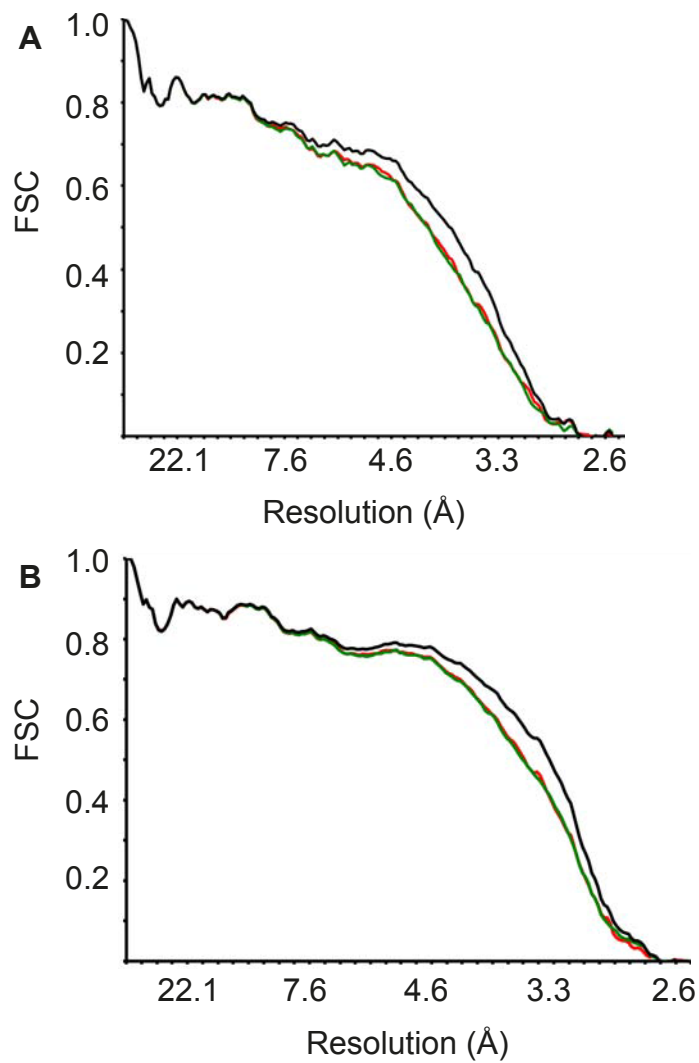

Supplement: supp [file elife-03080-supp-v1.zip]

Figure 5 - supplement 1

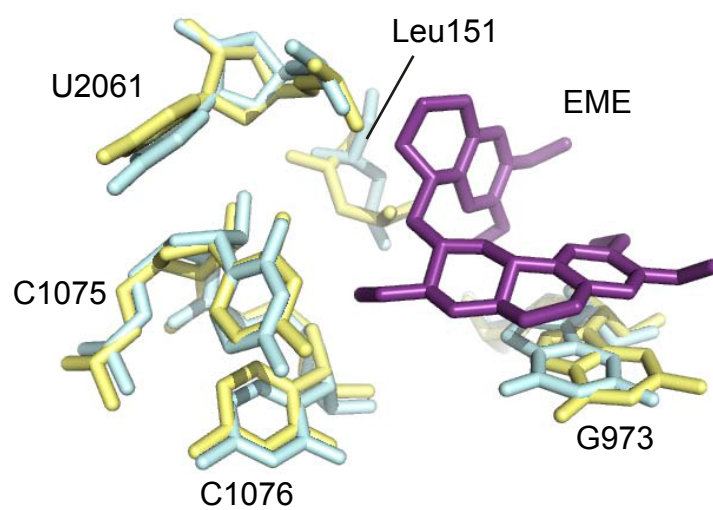

Supplement: supp [file elife-03080-supp-v1.zip]
